# Supplementary material for: Impact of work-related cancers in Taiwan—Estimation with QALY (quality-adjusted life year) and healthcare costs
Source: PubMed Central journal article supplement — Prev Med Rep. 2016 May 25;4:87–93. doi: 10.1016/j.pmedr.2016.05.015 (PMC4929078; doi:10.1016/j.pmedr.2016.05.015), 2016-05-25
Supplement: mmc1.pdf [file mmc1.pdf]

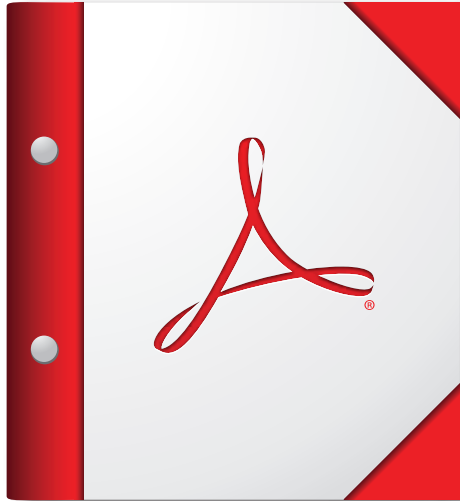

**For the best experience, open this PDF portfolio in  
Acrobat 9 or Adobe Reader 9, or later.**

[Get Adobe Reader Now!](#)
